# Supplementary material for: An integrated analysis of contemporary methane emissions and concentration trends over China using in situ, satellite observations, and model simulations
Source: Copernicus journal article supplement (doi:10.5194/acp-2021-464), 2021-08-19
Supplement: Supplementary file 1 [file acp-2021-464-supplement.pdf]

**Table S1. Global CH<sub>4</sub> sources and sinks (Tg CH<sub>4</sub> a<sup>-1</sup>) in the 2000s and 2010s. Our results with the EDGAR inventory (GCE) and the CEDS inventory (GCC) are compared with values summarized by Saunois et al. (2020).<sup>a</sup>**

| Time period                 | Saunois et al. (2020) |               |               |               | This study |     |           |     |
|-----------------------------|-----------------------|---------------|---------------|---------------|------------|-----|-----------|-----|
|                             | 2000–2009             |               | 2008–2017     |               | 2000–2009  |     | 2008–2017 |     |
| Approach <sup>1</sup>       | B-U                   | T-D           | B-U           | T-D           | GCE        | GCC | GCE       | GCC |
| Anthropogenic sources       | 334 (321–358)         | 332 (312–347) | 366 (349–393) | 359 (336–376) | 327        | 340 | 362       | 380 |
| Agriculture and waste       | 192 (178–206)         | 202 (198–219) | 206 (191–223) | 217 (207–240) | 205        | 186 | 220       | 200 |
| Biomass and biofuel burning | 31 (26–46)            | 29 (23–35)    | 30 (26–40)    | 30 (22–36)    | 26         | 25  | 29        | 27  |
| Fossil fuels                | 110 (94–129)          | 101 (71–151)  | 128 (113–154) | 111 (81–131)  | 94         | 129 | 112       | 153 |
| Natural sources             | 369 (245–485)         | 215 (176–243) | 371 (245–488) | 218 (183–248) | 193        |     | 194       |     |
| Wetlands                    | 147 (102–179)         | 180 (153–196) | 149 (102–182) | 181 (159–200) | 177        |     | 177       |     |
| Other sources               | 222 (143–306)         | 35 (21–47)    | 222 (143–306) | 37 (21–50)    | 17         |     | 17        |     |
| Sinks                       |                       |               |               |               |            |     |           |     |
| Soils                       | 30 (11–49)            | 34 (27–41)    | 30 (11–49)    | 38 (27–45)    | 18         |     | 18        |     |
| Total chemical loss         | 595 (489–749)         | 505 (459–516) | 595 (489–749) | 518 (474–532) | 494        | 501 | 519       | 535 |
| Totals                      |                       |               |               |               |            |     |           |     |
| Sum of sources              | 703 (566–842)         | 547 (524–560) | 737 (594–881) | 576 (550–594) | 520        | 533 | 556       | 574 |
| Sum of sinks                | 625 (500–798)         | 540 (486–556) | 625 (500–798) | 556 (501–574) | 512        | 519 | 537       | 553 |
| Imbalance                   | 78                    | 3 (–10–38)    | 112           | 13 (0–49)     | 8          | 14  | 19        | 21  |

<sup>a</sup> Values are estimated by the bottom-up (B-U) and top-down (T-D) approaches, and from our GCC and GCE simulations. Values from Saunois et al. (2020) are presented as means and ranges (minimum and maximum). Rounding errors may result in 1 Tg CH<sub>4</sub> a<sup>-1</sup> differences in the totals.

**Table S2. Main categories of CH<sub>4</sub> sources and sinks in GCE and GCC**

| Sectors            |                                  | GCE                                            | GCC                                        |
|--------------------|----------------------------------|------------------------------------------------|--------------------------------------------|
| Sources            | Agriculture and waste (AW)       | Enteric fermentation & Manure management (LIV) | Non-combustion agricultural sector (AGR)   |
|                    |                                  | Rice cultivation (RIC)                         |                                            |
|                    |                                  | Waste water handling (WST)                     | Waste disposal and handling (WST)          |
|                    |                                  | Solid waste landfills (LDF)                    |                                            |
|                    | Solid waste incineration         |                                                |                                            |
|                    | Biomass and biofuel burning (BB) | Biomass burning (BBN)                          | Biomass burning (BBN)                      |
|                    |                                  | Energy for buildings                           | Residential, commercial and other (RCO)    |
|                    | Fossil fuels (FF)                | Fuel exploitation (FUEL)                       | Energy transformation and extraction (ENE) |
|                    |                                  | Transport <sup>a</sup>                         | Surface transportation (TRA)               |
|                    |                                  |                                                | International shipping (SHP)               |
|                    | Industry <sup>b</sup>            | Industrial combustion and processes (IND)      |                                            |
| Wetlands (WL)      | Wetlands (WTL)                   |                                                |                                            |
| Other sources (OT) | Agricultural waste burning       | /                                              |                                            |
|                    | Geological seeps (SEE)           |                                                |                                            |
|                    | Termites (TER)                   |                                                |                                            |
| Sinks              | Soil uptake (SU)                 | Soil absorption (SAB)                          |                                            |
|                    | Chemical loss (CL)               | Tropospheric OH (OL)                           |                                            |
|                    |                                  | Stratospheric loss (SL)                        |                                            |
|                    |                                  | Tropospheric Cl (Cl)                           |                                            |

15 <sup>a</sup> The transport source includes CH<sub>4</sub> emissions from aviation climbing, descent, cruise, landing, take off and supersonic, railways, pipelines, off-road transport, shipping, and road transportation.

<sup>b</sup> The industry source includes emissions from oil refineries and transformation industry, power industry, combustion for manufacturing, chemical process, and iron and steel production.

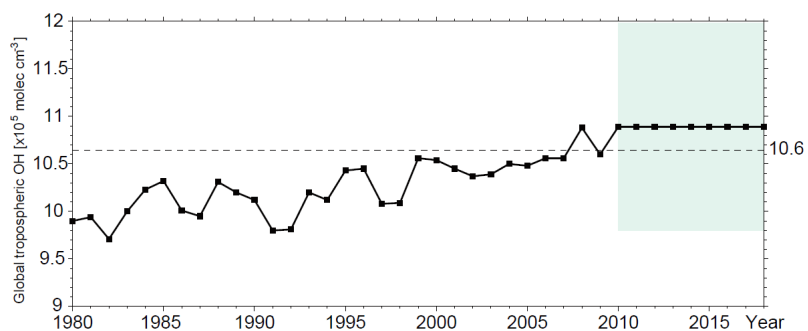

25 **Figure S1.** Global mean tropospheric OH concentrations in 1980–2010 from the CESM model results of Zhao et al. (2019). OH concentrations are fixed to the 2010 levels for the years 2011–2018. The shading denotes  $\pm 10\%$  of the prescribed OH levels in the sensitivity simulations (Table 1) for 2010–2018. The dashed black line represents the prescribed value of  $10.6 \times 10^5$  molecules  $\text{cm}^{-3}$  (see Table 1).

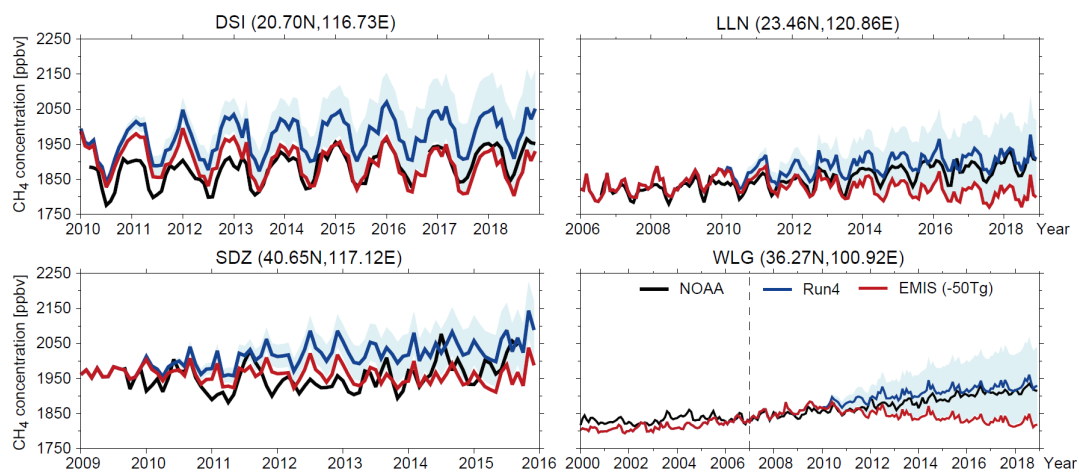

30

**Figure S2.** The influences of CH<sub>4</sub> emissions and OH levels on simulated CH<sub>4</sub> concentrations at Chinese surface sites. Measured monthly mean CH<sub>4</sub> concentrations at the four Chinese surface sites are compared with model results from the Run4 (with varying OH, blue lines) and Run7 (-50 Tg over 2010–2018, red lines) simulations (see Table 1). The blue shaded areas represent model results covered by ±10% of the prescribed OH levels in 2010-2018 (Run5 and Run6 in Table 1).

35

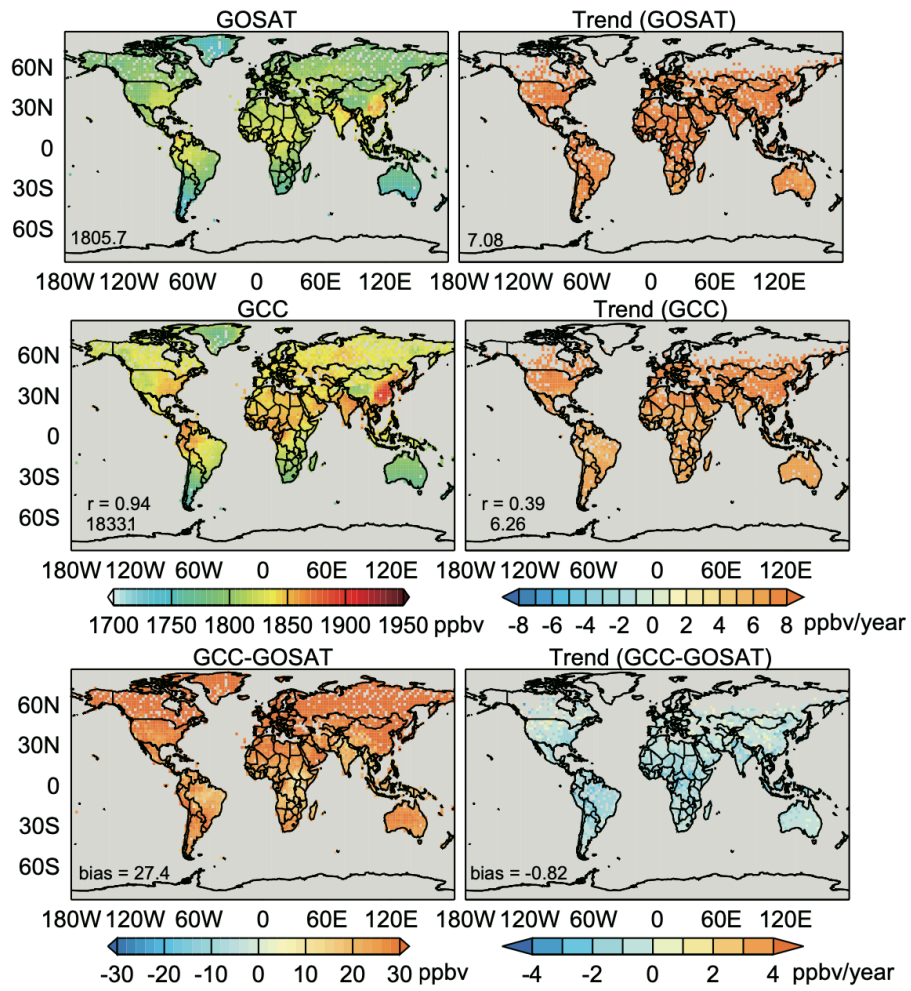

**Figure S3.** 2010–2017 annual mean GOSAT observed (top panels) and GCC model simulated (middle panels) atmospheric column mean CH<sub>4</sub> concentration and trends. The bottom panels show model minus GOSAT differences.

40

45

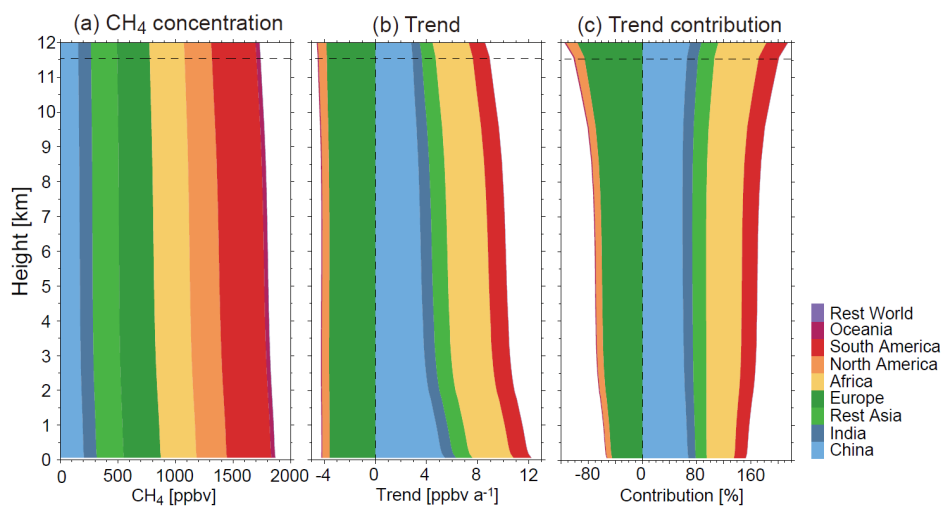

50 **Figure S4.** Vertical distributions of Chinese (a) CH<sub>4</sub> concentrations, (b) trends and (c) trends in percentage as contributed by different region-specific tracers averaged over 2007–2018. Dashed lines denote the annual mean tropopause height over China.
